CARDIOVASCULAR

**Semi-invasive monitoring of cardiac output by a new device  
using arterial pressure waveform analysis: a comparison  
with intermittent pulmonary artery thermodilution  
in patients undergoing cardiac surgery**

**J. Mayer\*, J. Boldt, T. Schöllhorn, K. D. Röhm, A. M. Mengistu and S. Suttner**

*Department of Anaesthesiology and Intensive Care Medicine, Klinikum Ludwigshafen, Bremsenstr. 79,  
67063 Ludwigshafen, Germany*

*\*Corresponding author. E-mail: j-mayer@gmx.de*

Institutional Review Board (IRB) approval of this research could not be verified during an investigation by the Landesärztekammer Rheinland-Pfalz (the State Medical Association of Rheinland-Pfalz in Germany). As a result, this article has been retracted, in accordance with the Journal's regulations, at the request of the Directors and Board of the *British Journal of Anaesthesia*. Lack of IRB approval means that the research was unethical, and that IRB approval for the research was misrepresented in the published article. It does not mean that the research results per se are fraudulent. For further information please see Retraction.

Retracted

Retracted

Retracted

Retracted

Retracted

Retracted
